# Supplementary material for: Synthesis, characterization and electronic properties of an endohedral plumbaspherene [Au@Pb12]3−
Source: Royal Society of Chemistry journal article supplement (doi:10.1039/c7qi00209b), 2017-01-01
Supplement: c7qi00209b1.pdf [file c7qi00209b1.pdf]

# Synthesis, Characterization and Electronic Properties of an Endohedral Plumbaspherene [Au@Pb<sub>12</sub>]<sup>3-</sup>

Lei-Jiao Li,<sup>a,†</sup> Fu-Xing Pan,<sup>a, b,†</sup> Feng-Yu Li,<sup>c</sup> Zhong-Fang Chen,<sup>c\*</sup> and Zhong-Ming Sun,<sup>a, d\*</sup>

<sup>a</sup> State Key Laboratory of Rare Earth Resource Utilization, Changchun Institute of Applied Chemistry, Chinese Academy of Sciences, 5625 Renmin Street, Changchun, Jilin 130022, China.

<sup>b</sup> Key Laboratory of Nonferrous Metals Chemistry and Resources Utilization of Gansu Province and State Key Laboratory of Applied Organic Chemistry, College of Chemistry and Chemical Engineering, Lanzhou University, Lanzhou 730000, PR China.

<sup>c</sup> Department of Chemistry, Institute for Functional Nanomaterials, University of Puerto Rico, San Juan, PR 00931, USA.

<sup>d</sup> State Key Laboratory of Coordination Chemistry, School of Chemistry and Chemical Engineering, Nanjing University, Nanjing 210023, P. R. China.

<sup>†</sup>These authors contributed equally to this work.

## Content:

1. Synthesis of [K([2.2.2]crypt)]<sub>3</sub>[Au@Pb<sub>12</sub>]·2py
2. X-ray crystal structure determination
3. <sup>207</sup>Pb NMR spectrum
4. Computational details
5. References

## 1. Synthesis of [K([2.2.2]crypt)]<sub>3</sub>[Au@Pb<sub>12</sub>]·2Py

All manipulations and reactions were performed under a nitrogen atmosphere using standard Schlenk or glovebox techniques. Ethylenediamine (en) (Aldrich, 99%) was freshly distilled by CaH<sub>2</sub> prior to use. Toluene (tol) (Aldrich, 99.8%) was distilled from sodium/benzophenone under dinitrogen and stored under dinitrogen. K (Aldrich, 99%), Na (Aldrich, 99.7%), Pb (Aldrich, 99.9%), CaH<sub>2</sub> (Aldrich, 99.99%), and benzophenone (Aldrich, 99.5%) were used as received. [2.2.2]crypt (4,7,13,16,21,24-Hexaoxa-1,10-diazabicyclo[8.8.8]hexacosane, TCI, 98%, ) were dried in a vacuum for 1 d. K<sub>4</sub>Pb<sub>9</sub> and Au(PPh<sub>3</sub>)Ph were prepared according to literatures, respectively.<sup>[1-2]</sup>

Synthesis of [K([2.2.2]crypt)]<sub>3</sub>[Au@Pb<sub>12</sub>]·2Py: In a 10 mL vial, 202 mg (0.10 mmol) of K<sub>4</sub>Pb<sub>9</sub> and 100 mg (0.27 mmol) of [2.2.2]crypt were dissolved in pyridine (2 mL). In a second vial, 50 mg (0.09 mmol) Au(PPh<sub>3</sub>)Ph was dissolved in 0.5 mL toluene. The toluene solution was added to ethylenediamine solution dropwise while stirring vigorously. After 4h at room temperature, the resulting black solution was filtered through glass wool and transferred to a test tube, then carefully layered by toluene (3 mL). After 3 days, dark red crystals of

[K([2.2.2]crypt)]<sub>3</sub>[Au@Pb<sub>12</sub>]·2Py (23% yield based on Au) appeared on the interface of the tube wall.

## 2. X-ray crystal structure determinations

Crystallographic data were collected at 298 K on a Bruker Apex II CCD diffractometer with graphite-monochromated Mo K $\alpha$  radiation ( $\lambda = 0.71073$  Å). Data processing was accomplished with the SAINT program.<sup>[3]</sup> The structures were solved by direct methods and refined on  $F^2$  by full-matrix least squares using SHELXTL<sup>4</sup>. The CCDC number of [K([2.2.2]crypt)]<sub>3</sub>[Au@Pb<sub>12</sub>]·2Py is 1492938. These data can be obtained free of charge from The Cambridge Crystallographic Data Centre via [www.ccdc.cam.ac.uk/data\\_request/cif](http://www.ccdc.cam.ac.uk/data_request/cif).

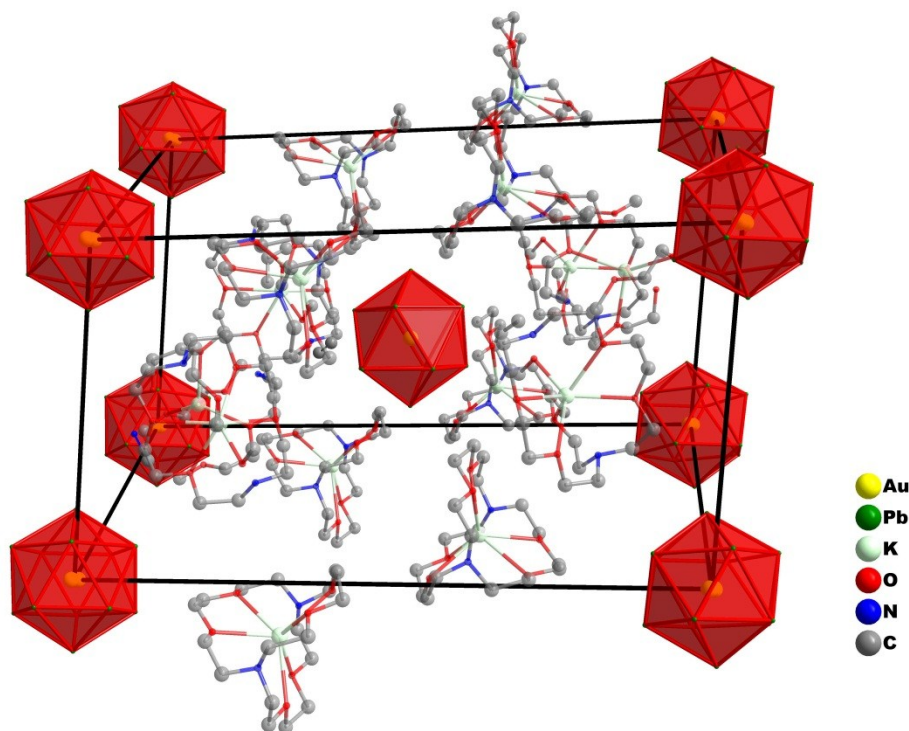

**Figure S1.** Unit cell of [K([2.2.2]crypt)]<sub>3</sub>[Au@Pb<sub>12</sub>]·2Py. Hydrogen atoms have been omitted for clarity.

**Table S1.** X-ray measurement and structure solutions of [K([2.2.2]crypt)]<sub>3</sub>[Au@Pb<sub>12</sub>]·2Py.

|                                           |                                                                                                   |
|-------------------------------------------|---------------------------------------------------------------------------------------------------|
| Compound                                  | C <sub>64</sub> H <sub>118</sub> N <sub>8</sub> O <sub>36</sub> K <sub>3</sub> AuPb <sub>12</sub> |
| Formula weight                            | 4376.3155                                                                                         |
| Crystal system                            | triclinic                                                                                         |
| Space group                               | <i>P</i> -1                                                                                       |
| <i>a</i> / Å                              | 14.4831(14)                                                                                       |
| <i>b</i> / Å                              | 14.7999                                                                                           |
| <i>c</i> / Å                              | 27.187(3)                                                                                         |
| <i>a</i> / °                              | 95.424                                                                                            |
| $\beta$                                   | 93.193(2)                                                                                         |
| $\gamma$                                  | 109.314(2)                                                                                        |
| <i>V</i>                                  | 5451.7(9)                                                                                         |
| <i>Z</i>                                  | 2                                                                                                 |
| $\rho_{\text{calc}}$ / g·cm <sup>-3</sup> | 2.479                                                                                             |

|                                                     |                                  |
|-----------------------------------------------------|----------------------------------|
| $\mu(\text{MoK}\alpha) / \text{mm}^{-1}$            | 19.956                           |
| $2\theta$ range / °                                 | 1.68-52.18                       |
| Reflections collected / unique                      | 56398 / 19229                    |
| Data / restraints / parameters                      | 19097 / 0 / 905                  |
| Final $R$ indices ( $I > 2\sigma(I)$ ) <sup>a</sup> | $R_1 = 0.10677$ $wR_2 = 0.1715$  |
| $R$ indices (all data)                              | $R_1 = 0.1447$ , $wR_2 = 0.2043$ |
| Goof (all data) <sup>b</sup>                        | 0.964                            |
| Max. peak/hole / $e^{-\text{Å}^{-3}}$               | 4.17/-1.81                       |

$$^a R_1 = \sum ||F_o| - |F_c|| / \sum |F_o|; wR_2 = \{ \sum w[(F_o)^2 - (F_c)^2]^2 / \sum w[(F_o)^2]^2 \}^{1/2}$$

$$^b \text{Goof} = \{ \sum w[(F_o)^2 - (F_c)^2]^2 / (n-p) \}^{1/2}$$

### 3. <sup>207</sup>Pb NMR spectrum

The <sup>207</sup>Pb NMR spectra were recorded on Bruker DRX500 Avance spectrometer operating at 104.5 MHz for a sample of 10 mM solution of single crystals in DMF. The <sup>207</sup>Pb chemical shift was externally referenced to Pb(NO<sub>3</sub>)<sub>2</sub> in D<sub>2</sub>O (1M, 2961.2 ppm) at room temperature. The spectrum shows a single resonance at -785 ppm arising from the 12 chemically equivalent Pb atoms in the structure. The <sup>207</sup>Pb NMR chemical shifts of [Au@Pb<sub>12</sub>]<sup>3-</sup> are upfield relative to other known [M@Pb<sub>12</sub>]<sup>2-</sup> ([Pt@Pb<sub>12</sub>]<sup>2-</sup>, +1780; [Pd@Pb<sub>12</sub>]<sup>2-</sup>, +1520; [Ni@Pb<sub>12</sub>]<sup>2-</sup>, +1167), which may be attributed to the different interstitial atom.

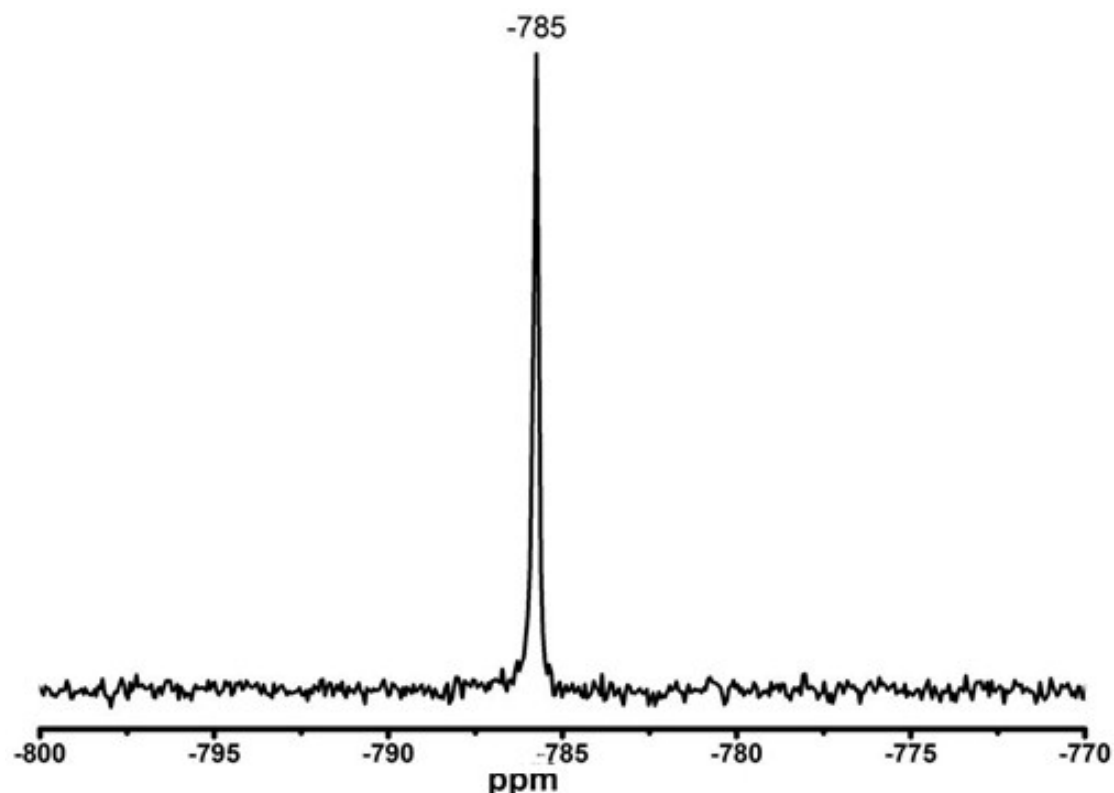

Figure S2: <sup>207</sup>Pb NMR spectrum of [Au@Pb<sub>12</sub>]<sup>3-</sup> recorded in DMF at room temperature and 83.7 MHz.

### 4. Computational details

All the quantum chemical calculations were carried out using Gaussian 09 package<sup>5</sup>. The geometry optimization was performed using PBE0 functional<sup>[6-7]</sup> with Def2-TZVP basis set.<sup>[8]</sup> Compensation of the negative charges on the  $[\text{Au@Pb}_{12}]^{3-}$  cluster was achieved by simulating mirror charges using the SMD model.<sup>[9]</sup> The natural population analysis (NPA)<sup>[10]</sup> was conducted based on the optimized structure using the NBO3.1 module as implemented in the Gaussian 09 package. The nucleus-independent chemical shifts (NICS) values<sup>[11]</sup> were computed with the Amsterdam Density Functional program (ADF 2013.01).<sup>[12-13]</sup> The scalar relativistic (SR) and spin-orbit coupling (SOC) effects were taken into account by the zero order regular approximation (ZORA). Valence triple- $\zeta$  plus one polarization (TZP) basis sets of Slater type were applied.

To understand the stability, both  $\text{Pb}_{12}^{2-}$  and  $\text{Pb}_{12}^{4-}$  were optimized at the PBE0/def2-TZVP level of theory. The Cartesian coordinates of the optimized structures and the energy levels of both  $\text{Pb}_{12}^{2-}$  and  $\text{Pb}_{12}^{4-}$  are given in Table S2 and Figure S3, respectively. Obviously,  $\text{Pb}_{12}^{2-}$  keeps the perfect icosahedral ( $I_h$ ) symmetry, whereas,  $\text{Pb}_{12}^{4-}$  adopts a less compact prolate shape. Both anionic clusters have no imaginary frequency. The HOMO-LUMO gap of  $\text{Pb}_{12}^{4-}$  is much smaller than that of  $\text{Pb}_{12}^{2-}$  (1.90 eV vs 3.26 eV). As for  $\text{Pb}_{12}^{4-}$ , the extra two electrons fill the LUMO of  $\text{Pb}_{12}^{2-}$ , and this nearly introduced occupied orbital breaks the otherwise perfect  $I_h$  spherical symmetry of the cluster. In addition, the interactions between HOMO of  $\text{Pb}_{12}$  and 3d-orbital of Au have been plotted in Figure S4.

Chemical bonding analyses of  $[\text{Au@Pb}_{12}]^{3-}$  was performed via the Adaptive Natural Density Partitioning method at the PBE0/Def2-TZVP level of theory. All the AdNDP calculations were performed using the Gaussian 09 software package and analyzed by the Multiwfn 3.3.9 software package.<sup>[14]</sup> In total, there are 62 valence electrons (31 pairs) in  $[\text{Au@Pb}_{12}]^{3-}$  cluster. AdNDP transformed all these canonical molecular orbitals into the nc-2e bonding elements presented below (Figure S5).

Firstly, it found the following lone pairs (1c-2e) and classical (2c-2e) bonds:

- 1) Five d-type LPs on Au atom with ON=1.97-1.98 |e| (Figure S4a)
- 2) Twelve s-type LPs on each apical Pb atoms with ON=1.928 |e| (Figure S4b)
- 3) Four 4c-2e  $\text{AuPb}_3$   $\sigma$  bonds with ON=1.80-1.92 |e| (Figure S4c)
- 4) Six 12c-2e bonds with ON=2.00 |e| (Figure S4d)
- 5) Four 13c-2e  $\pi$  bonds with ON=2.00 |e| (Figure S4e)

It is note that four 13c-2e  $\pi$  bonds are formed by the interaction of 6p-orbitals of Pb with 6p-orbitals of Au. Essentially, these 8  $\pi$  electrons satisfy the  $2(N+1)2$  rule with  $N=1$ , contributing to the strong stabilities of the cluster.

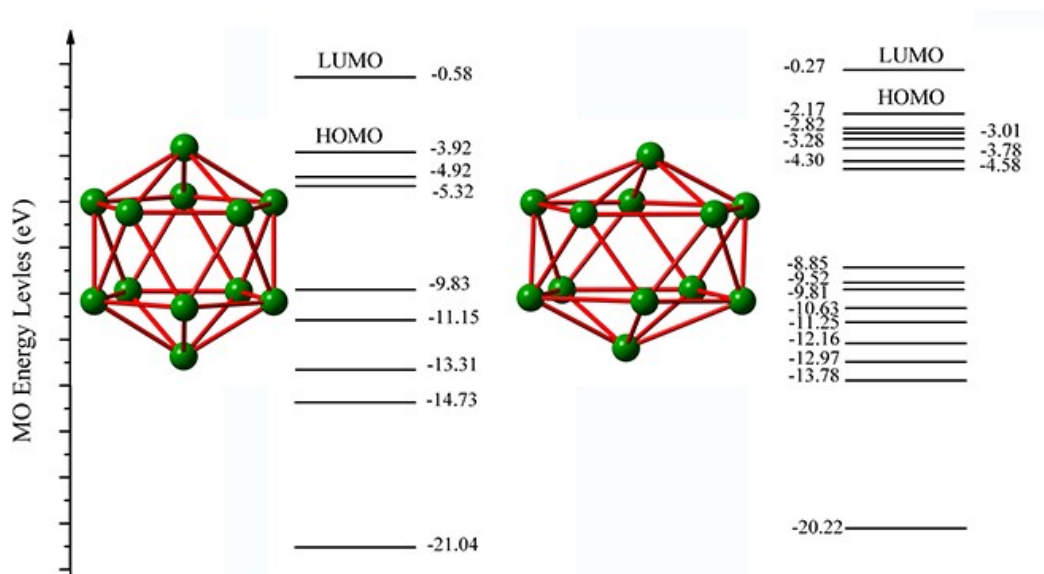

Figure S3. The molecular orbital energy levels of [Pb<sub>12</sub>]<sup>2-</sup> (left) and [Pb<sub>12</sub>]<sup>4-</sup> (right).

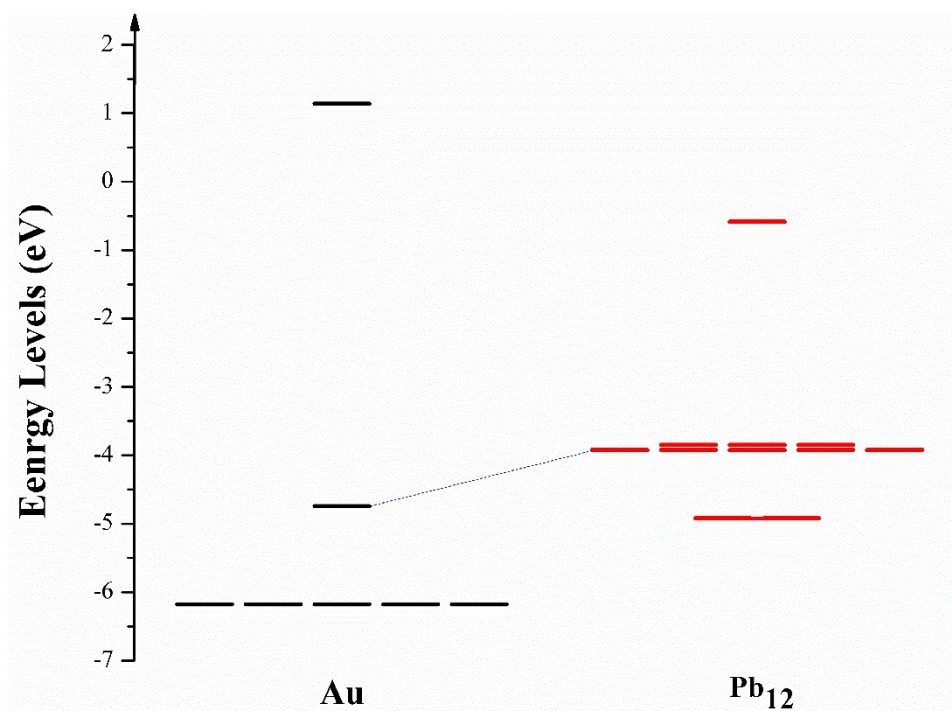

Figure S4. The interactions between HOMO of Pb<sub>12</sub> and 3d-orbital of Au

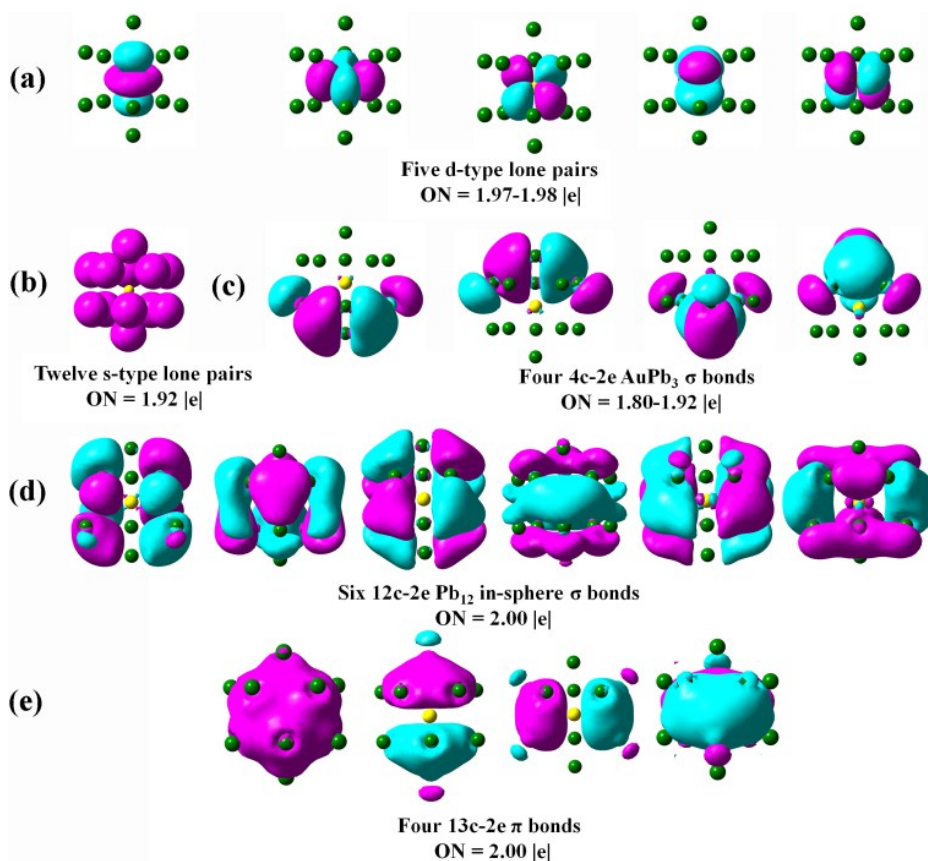

**Figure S5** The AdNDP bonding pattern for  $[\text{Au}@Pb_{12}]^{3-}$  grouped into five subsets with the corresponding occupation numbers (ON).

**Table S2.** Cartesian coordinates of the optimized structures of  $[\text{Au}@Pb_{12}]^{3-}$ ,  $Pb_{12}^{2-}$  and  $Pb_{12}^{4-}$  at the PBE0/Def2-TZVP level of theory.

|                            |          |    |             |             |             |
|----------------------------|----------|----|-------------|-------------|-------------|
| $[\text{Au}@Pb_{12}]^{3-}$ | $D_{3d}$ | Pb | 0.00000000  | -2.19576838 | 2.37276826  |
|                            |          | Pb | -2.69176227 | -1.55408967 | 0.85454023  |
|                            |          | Pb | 1.90159120  | -1.09788419 | -2.37276826 |
|                            |          | Pb | 2.69176227  | -1.55408967 | 0.85454023  |
|                            |          | Pb | -1.90159120 | -1.09788419 | -2.37276826 |
|                            |          | Pb | 0.00000000  | -3.10817934 | -0.85454023 |
|                            |          | Pb | -1.90159120 | 1.09788419  | 2.37276826  |
|                            |          | Pb | 1.90159120  | 1.09788419  | 2.37276826  |
|                            |          | Pb | 0.00000000  | 2.19576838  | -2.37276826 |
|                            |          | Pb | -2.69176227 | 1.55408967  | -0.85454023 |
|                            |          | Pb | 2.69176227  | 1.55408967  | -0.85454023 |
|                            |          | Pb | 0.00000000  | 3.10817934  | 0.85454023  |
|                            |          | Au | 0.00000000  | -0.00000000 | -0.00000000 |
| $Pb_{12}^{2-}$             | $I_h$    | Pb | -0.00000000 | -0.00000000 | 3.04990857  |
|                            |          | Pb | -0.00000001 | 2.72792115  | 1.36396058  |
|                            |          | Pb | 2.59440718  | 0.84297401  | 1.36396058  |
|                            |          | Pb | 1.60343184  | -2.20693456 | 1.36396058  |

|                                |    |             |             |             |
|--------------------------------|----|-------------|-------------|-------------|
|                                | Pb | 2.59440719  | -0.84297399 | -1.36396058 |
|                                | Pb | -1.60343181 | -2.20693458 | 1.36396058  |
|                                | Pb | -2.59440718 | -0.84297401 | -1.36396058 |
|                                | Pb | 1.60343181  | 2.20693458  | -1.36396058 |
|                                | Pb | -1.60343184 | 2.20693456  | -1.36396058 |
|                                | Pb | -2.59440719 | 0.84297399  | 1.36396058  |
|                                | Pb | 0.00000000  | -0.00000000 | -3.04990857 |
|                                | Pb | 0.00000001  | -2.72792115 | -1.36396058 |
| Pb <sub>12</sub> <sup>4-</sup> | Pb | -0.19069836 | 0.26185869  | 3.42584636  |
|                                | Pb | -0.20558151 | 2.90466567  | 1.83925724  |
| C <sub>i</sub>                 | Pb | 2.29239125  | 0.86128319  | 1.41141199  |
|                                | Pb | 1.54510232  | -2.13547532 | 1.02579321  |
|                                | Pb | 2.69931118  | -1.09266264 | -1.83583166 |
|                                | Pb | -1.53413791 | -1.91637077 | 1.41573122  |
|                                | Pb | -2.29239125 | -0.86128319 | -1.41141199 |
|                                | Pb | 1.53413791  | 1.91637077  | -1.41573122 |
|                                | Pb | -1.54510232 | 2.13547532  | -1.02579321 |
|                                | Pb | -2.69931118 | 1.09266264  | 1.83583166  |
|                                | Pb | 0.19069836  | -0.26185869 | -3.42584636 |
|                                | Pb | 0.20558151  | -2.90466567 | -1.83925724 |

## References

1. A. Spiekermann, S. D. Hoffmann, T. F. Fässler, *Angew. Chem. Int. Ed.* 2006, 45, 3459.
2. F. P. Gabbaï, S. C. Chung, A. Schier, S. Krüger, N. Rösch, H. Schmidbaur, 1997, *Inorg. Chem.* 36, 5699.
3. SMART and SAINT (software packages); Siemens Analytical X-ray Instruments, Inc., Madison, WI, 1996.
4. SHELXTL Program, version 5.1; Siemens Industrial Automation, Inc., Madison, WI, 1997.
5. M. J. Frisch, G. W. Trucks, H. B. Schlegel, G. E. Scuseria, M. A. Robb, J. R. Cheeseman, G. Scalmani, V. Barone, B. Mennucci, G. A. Petersson, H. Nakatsuji, M. Caricato, X. Li, H. P. Hratchian, A. F. Izmaylov, J. Bloino, G. Zheng, J. L. Sonnenberg, M. Hada, M. Ehara, K. Toyota, R. Fukuda, J. Hasegawa, M. Ishida, T. Nakajima, Y. Honda, O. Kitao, H. Nakai, T. Vreven, J. A. Montgomery Jr., J. E. Peralta, F. Ogliaro, M. Bearpark, J. J. Heyd, E. Brothers, K. N. Kudin, V. N. Staroverov, R. Kobayashi, J. Normand, K. Raghavachari, A. Rendell, J. C. Burant, S. S. Iyengar, J. Tomasi, M. Cossi, N. Rega, J. M. Millam, M. Klene, J. E. Knox, J. B. Cross, V. Bakken, C. Adamo, J. Jaramillo, R. Gomperts, R. E. Stratmann, O. Yazyev, A. J. Austin, R. Cammi, C. Pomelli, J. W. Ochterski, R. L. Martin, K. Morokuma, V. G. Zakrzewski, G. A. Voth, P. Salvador, J. J. Dannenberg, S. Dapprich, A. D. Daniels, Ö. Farkas, J. B. Foresman, J. V. Ortiz, J. Cioslowski and D. J. Fox, GAUSSIAN 09W (Revision A.1), Gaussian Inc., Wallingford, CT, 2010.
6. A. D. Becke, *Phys. Rev. A* 1988, 38, 3098.
7. J. P. Perdew, *Phys. Rev. B* 1986, 33, 8822.
8. A. Schaefer, H. Horn, R. Ahlrichs, *J. Chem. Phys.* 1992, 97, 2571.
9. a) S. Miertus, E. Scrocco; J. Tomasi, *Chem. Phys.* 1981, 55, 117; b) S. Miertus, J. Tomasi, *Chem. Phys.* 1982, 65, 239; c) M. Cossi, R. Barone, R. Cammi, J. Tomasi, *Chem. Phys. Lett.* 1996, 255,

327.

10. A. E. Reed, R. B. Weinstock, F. Weinhold, *J. Chem. Phys.* 1985, 83, 735.
11. P. v. R. Schleyer, C. Maerker, A. Dransfeld, H. Jiao, N. J. R. v. E. Hommes, *J. Am. Chem. Soc.* 1996, 118, 6317.
12. E. J. Baerends, et al. ADF, SCM, Theoretical Chemistry, Vrije Universiteit, Amsterdam, 2013. See <http://www.scm.com>.
13. J. P. Perdew, K. Burke, M. Ernzerhof, *Phys. Rev. Lett.* 1996, 77, 3865–3868.
14. T. Lu, F. W. Chen, *J. Comp. Chem.* 2012, 33, 580.
